# Supplementary material
Source: publisher figshare collection journal article supplement (https://sage.figshare.com/ndownloader/files/14052662)
Supplement: Supplementary file 1 [file 14052662]

## Appendix to accompany manuscript

### *Europarties' election pledges and European Commission legislative priorities: An assessment of their overlap*

#### **I. Sources of documents and coding procedures**

This section discusses how we define and identify the units of analysis used in this project, and how we code them to generate our data. As sources of the data we use the following sets of documents. All documents were read in English by the authors.

(1) 2004 and 2009 election platforms for ELDR, EPP, PES, and the EGP Euro-parties; those were obtained from the Euromanifesto study project <http://europeanelectionstudies.net/ees-study-components/euromanifesto-study>. All documents were approved by the respective trans-national party congresses in preparation for each election. The documents vary in length by party and year; ELDR (27p in 2004, 3p in 2009), EPP (3p in 2004, 35p in 2009), PES (7p in 2004, 31p in 2009), EGP (6p in 2004, 8p in 2009). **To account for this variation in length and style, in our analyses, we cluster the standard errors by document/year.** The entirety of each document was coded using the procedure outlined below, **and each pledge was included only once in the analysis.**

(2) Communication from the Commission to the European Parliament, the Council, the European Economic and Social Committee and the Committee of the Regions for 2006 (issued on 25.10.2005), 2007 (issued on 4.06.2008), 2008 (issued on 23.10.2007), 2009 (issued on 5.11.2008), 2010 (issued on 31.03.2010), 2011 (issued on 27.10.2010), 2012 (issued on 15.11.2011), and 2013 (issued on 23.10.2012). In the text we refer to these documents as **Work Programmes**. From these documents we extracted a list of priorities, outlined in the Annexes, as priority items or initiatives. This way we use the legislative actions identified by the Commission itself as falling under its priorities. Those exact statements were used in our analyses, and we matched each pledge to at least one of the priorities, articulated in Commission documents.

See text below and tables 1 and 2 at the end of this document for further details on which sets of documents were compared to each other.

#### ***I.a. Identifying units of analysis***

We use the following definitions for the units of analysis.

(1) To identify *pledges* in the context of the Euromanifestos we included both narrow and broad statements following the procedures and examples detailed in Thomson et al (2017a). We include all statements that fall within these definitions regardless of which institution(s) should undertake the action. Each pledge was included once in the dataset.

Both researchers read all Euromanifestos to identify promise-type statements as defined above, and only statements **where both coders agreed meet the criteria are included in the analysis.** The researchers divided the coding of the remaining documents, and any questions/discrepancies about specific statements were discussed until an agreement was reached. Thus, the researchers are in full agreement on identifying the statements/units of analysis included in this study. Additionally, we conducted inter-coder reliability analyses with two research assistants external to this project. These coders read a total of 45% of the pledges, and the agreement between the authors on one hand and each of the coders was 84% and 92%, respectively. These rates are

consistent with recommended reliability metrics (see Lacy S and Riffe D 1996 Sampling error and selecting intercoder reliability samples for nominal content analysis. *Journalism and Mass Communication Quarterly* 73(4): 963–973, and Krippendorff K (1980) *Content Analysis: An Introduction to its Methodology*. London: Sage.)

#### Examples of pledges identified in Euromanifestos:

“We welcome the creation of the post of EU Foreign Minister, who will chair the Council of External Relations and be a Vice-President of the Commission, running a joint administration made up of Commission and Council officials as well as national civil servants.” (ELDR 2004)

“We demand the reform of the European agricultural policy to support rural development ...” (PES 2004)

“We will also work to maintain cultural diversity, for instance, by allowing incentives to the public broadcasting, ...” (Greens 2004)

“Language courses, ...[ are needed to assist legal migrants in integrating into the labour market and society]” (EPP 2009)

“There should be ... limits on excessive borrowing and bad loans to prevent excessive risk-taking and debt.” (PES 2009)

(2) The task of identifying policy priorities in the Commission Work Programmes was more straight forward, and from those documents we extracted the initiatives identified by the Commission in the annexes of each document. Unless noted otherwise by the Commission (e.g. noting a package of initiatives), each initiative was considered a separate policy priority. Each pre-legislative priority was included once in the dataset.

#### ***1.b. Coding by policy (sub)-area***

Once the pledges and policy priority statements were identified and input into an Excel spreadsheet from the respective documents, each statement was assigned a policy area code and subcode following the latest version of the European Union Policy Agendas (CAPIC) codebook at the time when our research was undertaken. The CAPIC codebook is available here [http://euagendas.weebly.com/uploads/9/9/4/3/9943893/eu\\_codebook\\_3.2\\_october-2013\\_general.pdf](http://euagendas.weebly.com/uploads/9/9/4/3/9943893/eu_codebook_3.2_october-2013_general.pdf)

We conducted a reliability analysis on 28% of the pledges to validate the authors coding of pledges by CAPIC area. Agreement was in the 84%-87% range between the researchers and the two external coders.

#### ***1.c. Ascertaining overlaps among documents***

The aim of our research is to determine if and to what extent election promises made by the political groups in the European Parliament are subsequently ‘adopted’ among the policy priorities issued by the European Commission in their communications to other European Union institutions. For that purpose we manually compared the following sets of documents, listed in si Table 1. The number of pledges/policy priorities in each document are noted in parenthesis.

{refer to si Table 1}

Automated comparison, utilizing software packages such as Turnitin.com or SafeAssign.com did not narrow down the overlap between documents in a way to make their use worthwhile. For the purpose of manual/visual comparison between documents, each was first sorted by CAPIC subcode. In the cases where statements in the two documents in each set had been assigned the same subarea code, each statement was read in full to determine if in addition to being on the same topic (e.g. VAT), it was also about the same issue/policy direction (e.g. reducing VAT). Through this process we identified all instances where pledge statements made by the Euro-parties represented in the EP's political groups were also reflected in the respective Commission documents.

The following are examples of overlap between pledges and Commission priorities. These were used to code our dependent variables.

*EPP 2009* called for “increase overall transparency” [of international financial architecture]. Commission Work Programme from 2011 proposed a Directive for Market in Financial Instruments to ... “to meet the overall aim of a level playing-field delivering market efficiency and transparency.”

*Greens 2004* called for “Our transport system must be reformed to increase efficiency and reduce pollution.”. This pledge was coded as overlapping with the following Commission *Work Programme issued in 2006*: “Green transport package: a) Communication on greening the transport sector. a) This Communication will present the main findings of three initiatives in the area of transport (Internalisation of external costs, Green Propulsion and ITS Action Plan) and will draw possible recommendations for the future.”

*PES 2004* called for more transparency “We will continue to press for further reform of the EU's institutions. We will fight for openness and transparency, with sound financial management, open competition and value for money in the European Commission.” Similarly, *Work Programme from 2006* noted the following priority “European Transparency Initiative. The goal of the initiative is to increase transparency (e.g. use of Community funds, lobbying).”

*ALDE 2009* called for “The single market should be reinforced and extended in energy”. Among the priorities listed in *Work Programmes 2012* was: “Internal energy market: This initiative will consider the state of play of the process towards the completion of the internal energy market by 2014 and encourage Member States to step up efforts by underlining benefits of the IEM for the citizens and business, identifying a possible need for further action in order to ensure that this objective is realised.”

#### ***1.d. Agreement between election platforms***

Following the procedure discussed above, we also identified overlap among election programs issued by the Europarties during the same election campaign. This information is used to test the expectation that when parties agree on policy priorities among themselves, those statements are more likely to be included in subsequent Commission documents. Comparison among the election platforms listed in si Table 2 (at the end of the document) was conducted.

{refer to si Table 2}

The following are examples of overlap between pledges issued by different political groups. These were used to code our independent variable(s) on agreement with other political groups.

In 2004, ALDE, EPP, and PES made pledge related to enhancing security and defense policy in the EU: “In order to develop European security and defence policy, ELDR fully supports the concept of structured cooperation among certain member states that are both militarily capable and politically willing.” (*ALDE 2004*); “We should further develop the European Security and Defence Policy to become a credible instrument in terms of conflict prevention and crisis management.” (*PES 2004*); “This includes making European Security and Defence Policy in close cooperation with NATO. New threats such as international terrorism must be met with suitable strategies, new mechanisms of conflict prevention and management, as well as a reassignment of our defence capabilities. More cooperation and joint standards in the field of armaments may contribute to more efficiency and better use of national defence budgets.” (*EPP 2004*).

In 2004, both the Greens and PES supported reform of the Common Agricultural Policy: “In order to achieve this we will continue to seek and support radical reform of the Common Agricultural Policy (CAP), with a strong reorientation towards organic farming, regional food products and rural development. This is also the way forward to safeguard the diverse landscapes of Europe and protect the biodiversity of its flora and fauna.” (*Greens 2004*) and “It is critical that the reformed agricultural policy...” (*PES 2004*).

In 2009, ALDE and EPP made pledge related to financial regulations involving international institutions: “A relapse into policies of nationalisation, over-regulation and protectionism would be a major mistake. ELDR supports intensified international cooperation among regulators and strengthening of international standards and believes a reformed IMF should play a leading role in this process in order to prevent future financial crises.” (*ALDE 2009*) and “Global institutions must be adapted to the new facts: This means improving the controls of worldwide financial markets in organisations like the International Monetary Fund.” (*EPP 2009*).

In 2009, EPP and PES committed to helping migrants with language acquisition: “Language courses, ... [are needed to assist legal migrants in integrating into the labour market and society]” (*EPP 2009*) and “We therefore propose to promote action at the appropriate levels (local, regional, national or European), such as language or cultural training, which supports the full integration of migrants in their new communities.” (*PES 2009*).

Pledges by the Greens and PES in 2009 called for faster rail network in Europe: “We want to speed-up investment in trans-European railroad connections and networks.” (*Greens 2009*) and “This includes building a more competitive and affordable high-speed rail network between major European cities and regions.” (*PES 2009*).

## **II. List of variables**

### *II.a. Dependent Variables*

DV: Agree WP 06-09 equals one (1), otherwise zero (0), if a pledge made by an Euro-party (EGP, ELDR, EPP, PES) during the 2004 EP elections overlaps with the content of at least one policy priority identified in an European Commission Work Program document issued during the 2006-2009 period.

DV: Agree WP 10-13 equals one (1), otherwise zero (0), if a pledge made by an Euro-party (EGP, ELDR, EPP, PES) during the 2009 EP elections overlaps with the content of at least one

policy priority identified in European Commission Work Program documents issued in the period 2010-2013.

The list of auxiliary variables used to calculate the dependent variables is listed in si Table 3 at the end of this document.

{refer to si Table 3}

### ***II.b. Main independent Variables***

For each pledge, issued by a Euro-party represented in the EP (EGP, ELDR, EPP, PES), Ordinary Legislative Procedure equals one (1), otherwise zero (0), if the policy area associated with the pledge falls under the ordinary legislative procedure rules of the European Parliament. To identify the policy areas that fall under this procedure pre- and post-Lisbon we relied on the document available here [http://ec.europa.eu/codecision/docs/legal\\_bases\\_en.pdf](http://ec.europa.eu/codecision/docs/legal_bases_en.pdf), and matched the CAPIC (sub)codes to each area listed in the document, noting the year when the legal basis took effect.

Details on the matching are available in si Table 4.

{refer to si Table 4}

The following dummy variable were created for test hypothesis 2

EPP/ELDR equals one (1), otherwise zero (0), for each pledge issued by this Europarty in the respective election year.

The following variables were used to test hypothesis 3

Commission Presidency equals one (1), otherwise zero, if the party that made the pledge also held the Commission Presidency.

Commission Portfolio equals one (1), otherwise zero (0), if the party that issued the pledge subsequently controlled the Commission portfolio associated with that policy area.

Commission Presidency x Commission Portfolio is the interaction between the above two variables.

### ***II.b. Control independent variables***

Council Saliency is a continuous measure capturing the saliency of the policy area of each pledge for the member states government parties represented in the Council of Ministers configurations. It is constructed in the following way. (1) For each election year, using the codebooks for the Euromanifesto project, we matched each pledge's CAPIC score to a variable, or a series of variables. For example, the CAPIC code 2301 corresponds to Euromanifesto variable 070100. CAPIC code 1980 – to variables 2-316 and 2-317; (2) We further identified which parties were in government after each election in each member state; (3) For each variable in the Euromanifesto data, we took the difference between positive and negative mentions of the topic, and averaged the resulting number across the government parties for each election period. (4) We then input those numbers for each pledge, by CAPIC category.

EP Salience is a continuous measure, provided by the Euromanifesto project, also reflecting the emphasis that the four Eurogroups included in this analysis attribute to the policy area of each pledge. Similar to the Council salience, the EP variable is calculated using the difference between positive and negative mentions of a topic (for those topics where there are such mentions).

Agreement is the share of seats held by the political groups that issued the same pledge. For this variable, we first coded whether a pledge issued by any political group shares the policy intent and direction with an election statement by another group, made during the same election, 2004 and 2009, respectively. We then summed up the percentage of seats that all the groups that agreed on a pledge held in the respective EP.

### III. Supplementary analyses and robustness checks

sa **Table 1.** Regression results combining Work Programmes for both legislative periods and adding a control variable Year.

|                                                     | Pledges by all Europarties |                       | Pledges by Europarties with<br>Commission portfolios |                       |
|-----------------------------------------------------|----------------------------|-----------------------|------------------------------------------------------|-----------------------|
|                                                     | Logit coefficient          | Odds ratio            | Logit coefficient                                    | Odds ratio            |
| <b>Ordinary Leg. Procedure</b>                      | 0.848***<br>(0.175)        | 2.335***<br>(0.409)   | 0.800***<br>(0.193)                                  | 2.226***<br>(0.430)   |
| <b>Council salience</b>                             | 0.346***<br>(0.058)        | 1.413***<br>(0.082)   | 0.322***<br>(0.062)                                  | 1.380***<br>(0.086)   |
| <b>EP salience</b>                                  | -0.046<br>(0.026)          | 0.955<br>(0.025)      | -0.067***<br>(0.020)                                 | 0.935***<br>(0.019)   |
| <b>Agreement</b>                                    | 0.014*<br>(0.007)          | 1.014<br>(0.007)      | 0.008<br>(0.012)                                     | 1.008<br>(0.012)      |
| <b>Year</b>                                         | -0.063<br>(0.059)          | 0.939<br>(0.055)      | -0.084<br>(0.071)                                    | 0.920<br>(0.066)      |
| <b>Commission Presidency</b>                        |                            |                       | 0.504<br>(0.316)                                     | 1.656<br>(0.524)      |
| <b>Commission Portfolio</b>                         |                            |                       | -0.007<br>(0.747)                                    | 0.993<br>(0.742)      |
| <b>Commission Presidency x Commission Portfolio</b> |                            |                       | -0.059<br>(0.172)                                    | 0.942<br>(0.162)      |
| <b>Constant</b>                                     | 125.003<br>(118.046)       | 1.94E+54<br>-2.29E+56 | 166.584<br>(143.176)                                 | 2.22E+72<br>-3.18E+74 |
| <b>N</b>                                            |                            | 597                   |                                                      | 483                   |
| <b>Log pseudolikelihood</b>                         |                            | -355.9703             |                                                      | -293.03221            |

sa **Table 2.** Logistic regression results with an additive measure for the two salience variables.

|                                                         | Pledges by all Europarties |                     |                     |                     | Pledges by Europarties with Commission portfolios |                     |                     |                     |
|---------------------------------------------------------|----------------------------|---------------------|---------------------|---------------------|---------------------------------------------------|---------------------|---------------------|---------------------|
|                                                         | Agree WP 06-09             |                     | Agree WP 10-13      |                     | Agree WP 06-09                                    |                     | Agree WP 10-13      |                     |
|                                                         | Logit coefficients         | Odds ratio          | Logit coefficients  | Odds ratio          | Logit coefficients                                | Odds ratio          | Logit coefficients  | Odds ratio          |
| <b>Ordinary Leg. Procedure</b>                          | 1.242***<br>(0.259)        | 3.462***<br>(0.897) | 0.699***<br>(0.145) | 2.012***<br>(0.292) | 1.130***<br>(0.246)                               | 3.096***<br>(0.763) | 0.555***<br>(0.063) | 1.742***<br>(0.111) |
| <b>EPP and ELDR</b>                                     | 0.541*<br>(0.216)          | 1.719*<br>(0.372)   | 1.060***<br>(0.154) | 2.886***<br>(0.446) |                                                   |                     |                     |                     |
| <b>Commission Presidency</b>                            |                            |                     |                     |                     | 0.000<br>(0.587)                                  | 1.000<br>(0.587)    | 0.801***<br>(0.110) | 2.229<br>(0.245)    |
| <b>Commission Portfolio</b>                             |                            |                     |                     |                     | -0.526**<br>(0.201)                               | 0.591<br>(0.119)    | 1.666***<br>(0.172) | 5.291<br>(0.912)    |
| <b>Commission Presidency x<br/>Commission Portfolio</b> |                            |                     |                     |                     | 0.034<br>(0.193)                                  | 1.035<br>(0.200)    | -0.310<br>(0.245)   | 0.734<br>(0.180)    |
| <b>Council salience</b>                                 | 0.174<br>(0.121)           | 1.190<br>(0.144)    | 0.371***<br>(0.032) | 1.450***<br>(0.046) | 0.228<br>(0.136)                                  | 1.257<br>(0.171)    | 0.323***<br>(0.072) | 1.381***<br>(0.099) |
| <b>EP salience</b>                                      | 0.014<br>(0.041)           | 1.014<br>(0.042)    | -0.066*<br>(0.029)  | 0.936<br>(0.028)    | -0.010<br>(0.023)                                 | 0.990<br>(0.023)    | -0.086**<br>(0.029) | 0.918<br>(0.027)    |
| <b>Agreement</b>                                        | 0.021<br>(0.011)           | 1.021<br>(0.011)    | -0.002<br>(0.005)   | 0.998<br>(0.005)    | 0.020<br>(0.016)                                  | 1.021<br>(0.016)    | -0.008<br>(0.012)   | 0.992<br>(0.012)    |
| <b>Constant</b>                                         | -2.006<br>(0.137)          | 0.135<br>(0.018)    | -1.838<br>(0.110)   | 0.159<br>(0.017)    | -1.589<br>(0.242)                                 | 0.204<br>(0.049)    | -1.230<br>(0.617)   | 0.292<br>(0.180)    |
| <b>N</b>                                                | 296                        |                     | 301                 |                     | 244                                               |                     | 239                 |                     |
| <b>Log pseudolikelihood</b>                             | -364559.4                  |                     | -338995             |                     | -314088                                           |                     | -269586             |                     |

**si. Table 1.** List of documents that were compared to identify overlap between pledges and priorities.

| 2004 election cycle |                   | 2009 election cycle |                   |
|---------------------|-------------------|---------------------|-------------------|
| Document            | Compared to       | Document            | Compared to       |
| ELDR 2004 (n = 167) | WP 2006 (n = 119) | ELDR 2009 (n = 37)  | WP 2010 (n = 37)  |
| ELDR 2004 (n = 167) | WP 2007 (n = 90)  | ELDR 2009 (n = 37)  | WP 2011 (n = 40)  |
| ELDR 2004 (n = 167) | WP 2008 (n = 108) | ELDR 2009 (n = 37)  | WP 2012 (n = 194) |
| ELDR 2004 (n = 167) | WP 2009 (n = 50)  | ELDR 2009 (n = 37)  | WP 2013 (n = 60)  |
| EPP 2004 (n = 23)   | WP 2006 (n = 119) | EPP 2009 (n = 41)   | WP 2010 (n = 40)  |
| EPP 2004 (n = 23)   | WP 2007 (n = 90)  | EPP 2009 (n = 41)   | WP 2011 (n = 38)  |
| EPP 2004 (n = 23)   | WP 2008 (n = 108) | EPP 2009 (n = 41)   | WP 2012 (n = 194) |
| EPP 2004 (n = 23)   | WP 2009 (n = 50)  | EPP 2009 (n = 41)   | WP 2013 (n = 60)  |
| PES 2004 (n = 56)   | WP 2006 (n = 119) | PES 2009 (n = 161)  | WP 2010 (n = 37)  |
| PES 2004 (n = 56)   | WP 2007 (n = 90)  | PES 2009 (n = 161)  | WP 2011 (n = 40)  |
| PES 2004 (n = 56)   | WP 2008 (n = 108) | PES 2009 (n = 161)  | WP 2012 (n = 194) |
| PES 2004 (n = 56)   | WP 2009 (n = 50)  | PES 2009 (n = 161)  | WP 2013 (n = 60)  |
| EGP 2004 (n = 50)   | WP 2006 (n = 119) | EGP 2009 (n = 62)   | WP 2010 (n = 37)  |
| EGP 2004 (n = 50)   | WP 2007 (n = 90)  | EGP 2009 (n = 62)   | WP 2011 (n = 40)  |
| EGP 2004 (n = 50)   | WP 2008 (n = 108) | EGP 2009 (n = 62)   | WP 2012 (n = 194) |
| EGP 2004 (n = 50)   | WP 2009 (n = 50)  | EGP 2009 (n = 62)   | WP 2013 (n = 60)  |



**si. Table 2.** List of party platforms that were compared to identify overlap/agreement between pledges.

| <b>2004 EP elections</b> |                    | <b>2009 EP elections</b> |                    |
|--------------------------|--------------------|--------------------------|--------------------|
| <b>Document</b>          | <b>Compared to</b> | <b>Document</b>          | <b>Compared to</b> |
| ELDR 2004 (n = 167)      | PES 2004 (n = 56)  | ELDR 2009 (n = 37)       | PES 2009 (n = 161) |
| ELDR 2004 (n = 167)      | EPP 2004 (n = 23)  | ELDR 2009 (n = 37)       | EPP 2009 (n = 41)  |
| ELDR 2004 (n = 167)      | EGP 2004 (n = 50)  | ELDR 2009 (n = 37)       | EGP 2009 (n = 62)  |
| EPP 2004 (n = 23)        | PES 2004 (n = 56)  | EPP 2009 (n = 41)        | PES 2009 (n = 161) |
| EPP 2004 (n = 23)        | EGP 2004 (n = 50)  | EPP 2009 (n = 41)        | EGP 2009 (n = 62)  |
| PES 2004 (n = 56)        | EGP 2004 (n = 50)  | PES 2009 (n = 161)       | EGP 2009 (n = 62)  |

**si Table 3.** Auxiliary variables used to calculate each dependent variable

|                                  |                                                                                                                                                                                                                                                                                                                                                                                                                                                                                                                                                                                                                                                                                                                                                                                                                                                                                                                                                                                                                                                                                                                                                                             |
|----------------------------------|-----------------------------------------------------------------------------------------------------------------------------------------------------------------------------------------------------------------------------------------------------------------------------------------------------------------------------------------------------------------------------------------------------------------------------------------------------------------------------------------------------------------------------------------------------------------------------------------------------------------------------------------------------------------------------------------------------------------------------------------------------------------------------------------------------------------------------------------------------------------------------------------------------------------------------------------------------------------------------------------------------------------------------------------------------------------------------------------------------------------------------------------------------------------------------|
| <p><u>DV: Agree WP 06-09</u></p> | <p><u>Agree WP 06</u> equals one (1), otherwise zero (0), if a pledge made by an Euro-party (EGP, ELDR, EPP, PES) during the 2004 EP elections overlaps with the content of a policy priority identified in European Commission Work Program document 2006, issued on October 25, 2005.</p> <p><u>Agree WP 07</u> equals one (1), otherwise zero (0), if a pledge made by an Euro-party (EGP, ELDR, EPP, PES) during the 2004 EP elections overlaps with the content of a policy priority identified in European Commission Work Program document 2007, issued on June 4, 2008.</p> <p><u>Agree WP 08</u> equals one (1), otherwise zero (0), if a pledge made by an Euro-party (EGP, ELDR, EPP, PES) during the 2004 EP elections overlaps with the content of a policy priority identified in European Commission Work Program document 2008, issued on October 10, 2007.</p> <p><u>Agree WP 09</u> equals one (1), otherwise zero (0), if a pledge made by an Euro-party (EGP, ELDR, EPP, PES) during the 2004 EP elections overlaps with the content of a policy priority identified in European Commission Work Program document 2009, issued on November 5, 2008.</p> |
| <p><u>DV: Agree WP 10-13</u></p> | <p><u>Agree WP 10</u> equals one (1), otherwise zero (0), if a pledge made by an Euro-party (EGP, ELDR, EPP, PES) during the 2009 elections overlaps with the content of a policy priority identified in European Commission Work Program document 2010, issued on March 31, 2010.</p> <p><u>Agree WP 11</u> equals one (1), otherwise zero (0), if a pledge made by an Euro-party (EGP, ELDR, EPP, PES) during the 2009 elections overlaps with the content of a policy priority identified in European Commission Work Program document 2011, issued on October 27, 2010.</p> <p><u>Agree WP 12</u> equals one (1), otherwise zero (0), if a pledge made by an Euro-party (EGP, ELDR, EPP, PES) during the 2009 elections overlaps with the content of a policy priority identified in European Commission Work Program document 2012, issued on November 15, 2011.</p> <p><u>Agree WP 13</u> equals one (1), otherwise zero (0), if a pledge made by an Euro-party (EGP, ELDR, EPP, PES) during the 2009 elections overlaps with the content of a policy priority identified in European Commission Work Program document 2013, issued on October 23, 2012.</p>          |

**si Table 4.** List of policy areas following under the ordinary legislative procedure, pre- and post- the Lisbon Treaty, and the corresponding CAPIC code(s). Information is used to construct independent dummy variable Ordinary Legislative Procedure.

| <b>Pre-Lisbon</b>                                                                         | <b>CAPIC CODE(S)</b> | <b>Added/changed with Lisbon</b>                                                                                                                  | <b>CAPIC CODE(S)</b> |
|-------------------------------------------------------------------------------------------|----------------------|---------------------------------------------------------------------------------------------------------------------------------------------------|----------------------|
| Procedures for the right of access to documents                                           | 208                  | Regulation on services of general economic interest                                                                                               | 1500                 |
| Data protection                                                                           | 208                  | Procedures and conditions required for citizen initiative                                                                                         | 2012                 |
| Measures to combat discrimination of the grounds of nationality                           | 201                  | Application of competition rules to agricultural products                                                                                         |                      |
| Basic principles for anti-discrimination incentive measures                               | 201, 202, 204, 205   | Legislation concerning the common agricultural policy and the common fisheries policy                                                             | 412, 408             |
| Measures to facilitate the exercise of the right to move and reside freely in the Union   | 200                  | Exclusion of certain activities from the application of provisions on the right of establishment                                                  |                      |
| Customs operations                                                                        | 2009                 | Extending provisions on freedom to provide services to service providers who are nationals of a third state and established within the Union      |                      |
| Free movement of workers                                                                  | 529                  | Liberalization of a specific service                                                                                                              |                      |
| Social security measures for Community migrant workers                                    | 529                  | Measures on the movement of capital to and from third countries                                                                                   | 1804                 |
| Right of establishment                                                                    | 1500                 | Administrative measures relating to capital movements in connection with preventing and combating crime and terrorism                             | 1227                 |
| Coordination of the provisions in Member states with regard to the right of establishment | 1500                 | Visas, border checks, free movement of nationals of third countries, management of external frontiers, absence of controls at internal frontiers. | 940, 950             |

|                                                                                                                                                                          |            |                                                                                                                                                     |            |
|--------------------------------------------------------------------------------------------------------------------------------------------------------------------------|------------|-----------------------------------------------------------------------------------------------------------------------------------------------------|------------|
| Coordination of the provisions in Member states concerning the taking-up and pursuit of activities as self-employed persons and the mutual recognition of qualifications | 1521       | Measures for a common European asylum system                                                                                                        | 931        |
| Services                                                                                                                                                                 | 1500       | Measures for a common immigration policy                                                                                                            | 900        |
| Implementation of common transport policy                                                                                                                                | 1000       | Incentive measures for the integration of nationals of third countries                                                                              | 941        |
| Sea and air transport                                                                                                                                                    | 1003, 1007 | Judicial cooperation in civil matters with cross-border implications (excluding family law).                                                        | 200        |
| Measures for the approximation of national provisions concerning the establishment and functioning of the internal market to promote the objectives of Article 26        | 1530       | Judicial cooperation in criminal matters - procedures, cooperation, training, settlement of conflicts, minimum rules for recognition of judgments   | 1201       |
| Inceptive measures for cooperation in the field of employment                                                                                                            |            | Minimal rules concerning the definition of criminal offenses and sanctions in the areas of particularly serious crime with a cross-border dimension | 1201       |
| Social policy (to encourage cooperation and adopt minimum requirements for gradual implementation)                                                                       | 1300       | Measures to support crime prevention                                                                                                                | 1211       |
| Equal opportunities, equal treatment of men and women in the matters of employment and equal pay.                                                                        | 202        | Eurojust (structure, operation, field of action and tasks)                                                                                          | 1201       |
| Implementing regulations relating to the European Social Fund                                                                                                            |            | Procedures for scrutiny of Europol's activities by EP and national parliaments                                                                      | 1201       |
| Incentive measures in the field of education                                                                                                                             |            | Measures to eliminate the distortions in the internal market                                                                                        | 1541, 1540 |
| Vocational training policy                                                                                                                                               | 604        | Intellectual property except language arrangements for the European intellectual property rights.                                                   | 1522       |
| Incentive measures in the field of culture                                                                                                                               |            | Multilateral surveillance procedures (broad guidelines of the economic policies)                                                                    | 1501       |

|                                                                                                                                                                                                                                                                           |      |                                                                                                                                                                                  |                   |
|---------------------------------------------------------------------------------------------------------------------------------------------------------------------------------------------------------------------------------------------------------------------------|------|----------------------------------------------------------------------------------------------------------------------------------------------------------------------------------|-------------------|
| Public health- measures to tackle common safety concerns in the health sphere                                                                                                                                                                                             | 331  | Modifications of certain articles of the Statutes of ESCB and ECB                                                                                                                | 104               |
| Consumer protection                                                                                                                                                                                                                                                       | 1525 | Measures necessary for the use of the Euro                                                                                                                                       | 104               |
| Trans-European networks                                                                                                                                                                                                                                                   | 800  | Incentive measures in the field of sport                                                                                                                                         | 1526              |
| Industry                                                                                                                                                                                                                                                                  | 108  | Public health - incentive measures to protect human health and in particular to combat the major cross-border health scourges, and measures to tackle tobacco and alcohol abuse. | 341, 342          |
| Measures in the area of economic and social cohesion outside the Structural funds.                                                                                                                                                                                        |      | Structural funds                                                                                                                                                                 | 1420              |
| European Regional Development Fund                                                                                                                                                                                                                                        |      | Cohesion fund                                                                                                                                                                    | 1420              |
| Framework programme for research                                                                                                                                                                                                                                          | 1798 | Implementation of European Research area                                                                                                                                         | 1798              |
| Implementation of the Framework program for research- rules for the participation of undertakings and dissemination of research results/Supplementary research programmes for some member states/participation in research programmes undertaken by several member states | 1798 | Space policy                                                                                                                                                                     | 1701, 1704        |
| Environment (community measures to achieve environmental objectives except measures of a fiscal nature)                                                                                                                                                                   |      | Energy (excluding measures of fiscal nature)                                                                                                                                     | all of category 8 |
| Environment (general action programmes)                                                                                                                                                                                                                                   | 700  | Tourism - measures to complement the action on the MS in the tourism sector                                                                                                      | 1524              |
| Implementation of development cooperation policy                                                                                                                                                                                                                          | 1901 | Civil protection against natural and man-made disasters                                                                                                                          | 2018              |
| Regulations governing political parties and their funding                                                                                                                                                                                                                 |      | Administrative cooperation in implementing Union law by member states                                                                                                            |                   |

|                                                               |      |                                                                                                                                     |      |
|---------------------------------------------------------------|------|-------------------------------------------------------------------------------------------------------------------------------------|------|
| Fight against fraud affecting the Union's financial interests | 2007 | Implementing measures of the common commercial policy                                                                               |      |
| Measures for the production of Union statistics.              | 2013 | Economic, technical, and fiscal cooperation with third countries, other than developing countries.                                  | 1900 |
|                                                               |      | General framework for humanitarian operations                                                                                       | 1901 |
|                                                               |      | European Voluntary Humanitarian Aid Corps                                                                                           |      |
|                                                               |      | Creation of specialized courts                                                                                                      |      |
|                                                               |      | Modification of statutes of court of justice                                                                                        |      |
|                                                               |      | Rules and general principles concerning mechanisms for control by member states of the Commission's exercise of implementing powers |      |
|                                                               |      | European Administration                                                                                                             |      |
|                                                               |      | Adoption of financial rules                                                                                                         | 1502 |
|                                                               |      | Staff regulations of Officials and Conditions of employment of other servants in the Union                                          | 2004 |

**si Table 5.** List of Commission portfolios associated with each CAPIC code. This list, along with information from the European Commission’s website on the political group of each Commissioner, was used to construct the Commission Portfolio Party variable.

| CAPIC codes                                                                                            | Commission Portfolio                                |                                               |
|--------------------------------------------------------------------------------------------------------|-----------------------------------------------------|-----------------------------------------------|
|                                                                                                        | <i>Barroso I</i>                                    | <i>Barroso II</i>                             |
| 100, 101, 103, 104, 105, 107, 110, 120, 199                                                            | Economic and Financial Affairs                      | Economic and Monetary Affairs and the Euro    |
| 108                                                                                                    | Enterprise and Industry                             | Industry and Entrepreneurship                 |
| 200, 201, 201, 204, 205, 206, 207, 208, 212, 213, 299                                                  | Justice, Freedom and Security                       | Justice, Fundamental Rights and Citizenship   |
| 300, 301, 302, 320, 321, 322, 323, 324, 325, 327, 331, 332, 333, 334, 341, 342, 343, 398, 399          | Health                                              | Health                                        |
| 400, 401, 402, 403, 404, 406, 407, 410, 411, 412, 498, 499, 1405                                       | Agriculture and Rural Development                   | Agriculture and Rural Development             |
| 408, 1007                                                                                              | Fisheries and Maritime Affairs                      | Agriculture and Rural Development             |
| 500, 501, 502, 503, 504, 505, 506, 509, 529, 599, 1300, 1302, 1303, 1304, 1305, 1306, 1308, 1310, 1399 | Employment, Social Affairs and Equal Opportunities  | Employment, Social Affairs and Inclusion      |
| 600, 601, 602, 603, 604, 606, 607, 698, 699, 2300, 2301, 2302, 2303, 2310, 2311, 2399                  | Education, Training and Culture and Multilingualism | Education, Culture, Multilingualism and Youth |
| 700, 701, 703, 707, 708, 709, 711, 712, 722, 723, 724, 730, 731, 798, 799, 2100,                       | Environment                                         | Environment                                   |

|                                                                                                                                                                  |                                                      |                                             |
|------------------------------------------------------------------------------------------------------------------------------------------------------------------|------------------------------------------------------|---------------------------------------------|
| 2101, 2103, 2104, 2105, 2199                                                                                                                                     |                                                      |                                             |
| 800, 801, 802, 803, 805, 806, 807, 898, 899                                                                                                                      | Energy                                               | Energy                                      |
| 900, 929, 931, 932, 933, 940, 941, 950, 999                                                                                                                      | Justice, Freedom and Security                        | Home Affairs                                |
| 1000, 1001, 1002, 1003, 1005, 1010, 1098, 1099                                                                                                                   | Transport                                            | Transport                                   |
| 1200, 1201, 1202, 1203, 1204, 1205, 1206, 1207, 1208, 1211, 1212, 1213, 1227, 1230, 1240, 1241, 1299                                                             | Justice, Freedom and Security                        | Justice, Fundamental Rights and Citizenship |
| 1400, 1401, 1403, 1404, 1406, 1408, 1409, 1420, 1499                                                                                                             | Regional Policy                                      | Regional Policy                             |
| 1500, 1501, 1502, 1504, 1505, 1507, 1521, 1522, 1524, 1526, 1530, 1541, 1542, 1595, 1598, 1599                                                                   | Internal Market and Services                         | Internal Market and Services                |
| 1525                                                                                                                                                             | Consumer Protection                                  | Consumer Protection                         |
| 1540                                                                                                                                                             | Competition                                          | Competition                                 |
| 1600, 1601, 1602, 1603, 1604, 1605, 1606, 1608, 1610, 1611, 1612, 1614, 1615, 1616, 1617, 1619, 1620, 1698, 1699, 1900, 1902, 1906, 1925, 1926, 1927, 1929, 1999 | External Relations and European Neighbourhood Policy | Foreign Affairs and Security Policy         |
| 1700, 1701, 1704, 1705, 1706, 1707, 1708, 1709, 1798, 1799                                                                                                       | Science and Research                                 | Research, Innovation and Science            |



|                                                                                                                  |                                                    |                                                  |
|------------------------------------------------------------------------------------------------------------------|----------------------------------------------------|--------------------------------------------------|
| 1800, 1802, 1803, 1804, 1806, 1807, 1808, 1899,                                                                  | Trade                                              | Trade                                            |
| 1901, 1905                                                                                                       | Development and Humanitarian Aid                   | Development                                      |
| 1980                                                                                                             | Enlargement                                        | Enlargement and European Neighbourhood Policy    |
| 2000                                                                                                             | Financial Programming and the Budget               | Financial Programming and the Budget             |
| 2002, 2003, 2004, 2005, 2006, 2007, 2008, 2009, 2012, 2013, 2015, 2018, 2030, 2032, 2033, 2040, 2041, 2042, 2099 | Institutional Relations and Communication Strategy | Inter-Institutional Relations and Administration |
| 2010                                                                                                             | Administrative Affairs, Audit and Anti-Fraud       | Inter-Institutional Relations and Administration |
| 2304                                                                                                             | Information Society and Media                      | Education, Culture, Multilingualism and Youth    |
